# Supplementary material for: pH-responsive curcumin-based nanoscale ZIF-8 combining chemophotodynamic therapy for excellent antibacterial activity
Source: Royal Society of Chemistry journal article supplement (doi:10.1039/d1ra09450e), 2022-01-01
Supplement: d1ra09450e1.pdf [file d1ra09450e1.pdf]

## Supplementary Material

# pH-responsive curcumin-based nanoscale ZIF-8 combining chemophotodynamic therapy for excellent antibacterial activity

Xiaofeng Meng<sup>a,b,#</sup>, Jingwei Guan<sup>a,b,#</sup>, Shanshan Lai<sup>a,b</sup>, Liming Fang<sup>c,e,f,\*</sup>,

Jianyu Su<sup>a,b,c,d,\*</sup>

<sup>a</sup> *School of Food Science and Engineering, South China University of Technology, Guangzhou 510640, Guangdong, China*

<sup>b</sup> *Guangdong Province Key Laboratory for Green Processing of Natural Products and Product Safety, Guangzhou, 510640, Guangdong, China.*

<sup>c</sup> *Sino-Singapore International Joint Research Institute, Guangzhou 510700, Guangdong, China.*

<sup>d</sup> *Overseas Expertise Introduction Center for Discipline Innovation of Food Nutrition and Human Health (111 Center), Guangzhou 510640, Guangdong, China.*

<sup>e</sup> *Key Laboratory of Biomedical Engineering of Guangdong Province, School of Materials Science and Engineering, South China University of Technology, Guangzhou 510640, China.*

<sup>f</sup> *National Engineering Research Center for Tissue Restoration and Reconstruction, South China University of Technology, Guangzhou 510006, China.*

<sup>g</sup> *College of Food Science, South China Agricultural University, Guangzhou 510642, Guangdong, China*

\* Corresponding author.

*E-mail addresses:* [jysu@scut.edu.cn](mailto:jysu@scut.edu.cn) (Jianyu Su), [lmfang@scut.edu.cn](mailto:lmfang@scut.edu.cn) (Liming Fang)

# These authors contributed equally to this work.

Table S1 Synthesis of CCM@ZIF

| Entry | Zn(NO <sub>3</sub> ) <sub>2</sub> ·6H <sub>2</sub> O (mg) | 2-MIM (mg) | CCM<br>(mg) | Time (min) | DLC (%) | DLE (%) |
|-------|-----------------------------------------------------------|------------|-------------|------------|---------|---------|
| 1     | 150                                                       | 330        | 3           | 15         | 2.23    | 13.02   |
| 2     | 150                                                       | 330        | 5           | 15         | 7.15    | 43.79   |
| 3     | 150                                                       | 330        | 9           | 15         | 6.31    | 21.58   |
| 4     | 150                                                       | 330        | 15          | 15         | 6.28    | 12.94   |
| 5     | 150                                                       | 330        | 25          | 15         | 31.60   | 57.76   |
| 6     | 150                                                       | 330        | 5           | 5          | 11.57   | 82.76   |
| 7     | 150                                                       | 330        | 5           | 10         | 2.47    | 21.96   |
| 8     | 150                                                       | 330        | 5           | 20         | 8.37    | 48.42   |

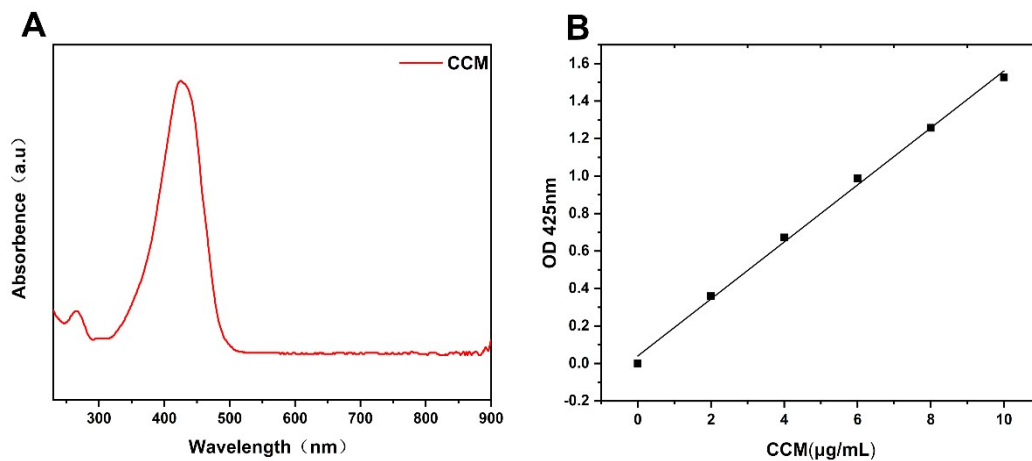

**Fig. S1** (A) The UV-vis absorption of CCM in ethanol. (B) The linear relationship between the concentration of CCM in ethanol and absorption intensity, and the regression equation is  $y = 0.1521x + 0.0401$  ( $R^2 = 0.9982$ ).
